# Supplementary material for: Exploring the Association between Cathepsin B and Parkinson’s Disease
Source: Brain Sci. 2024 May 10;14(5):482. doi: 10.3390/brainsci14050482 (PMC11119263; doi:10.3390/brainsci14050482)
Supplement: Supplementary file 1 [file brainsci-14-00482-s001.zip › Supplementary Tables revised.xlsx]

## Sheet: Supplementary Table S1
Supplementary Table S1: Detailed information for Database.
Data sources	Phenotypes	PMID	sample description
Sun Benjamin B et al. GWAS	Cathepsin B	29875488	3,301 European ancestry individuals
FinnGen R10 study data	Parkinson's disease		4681 cases and 407500 controls
Chen Y et.al GWAS	N-acetylaspartate (naa) levels	36635386	8,148 European ancestry individuals

## Sheet: Supplementary Table S2
Supplementary Table S2: Instrumental variables used in MR analysis in Cathepsin B.(P<5e-5)
rsid	effect_allele	other_allele	effect_allele_frequency	beta	standard_error	p_value
rs75773690	G	A	0.02192	-0.3945	0.0857	4.16869e-06
rs113646963	C	T	0.09708	0.1996	0.0427	2.95121e-06
rs76089522	G	A	0.10475	-0.1971	0.0421	2.88403e-06
rs200518932	C	CA	0.01693	-0.5167	0.11	2.63027e-06
rs13152767	G	A	0.02617	0.4158	0.0867	1.62181e-06
rs36021960	G	A	0.12637	0.1747	0.0374	3.01995e-06
rs11563944	A	G	0.26799	0.1291	0.0278	3.54813e-06
rs1692819	G	A	0.29182	0.4246	0.0274	5.24807e-54
rs148930853	T	C	0.01211	0.5516	0.1181	3.01995e-06
rs150811995	A	C	0.01878	0.4603	0.1004	4.57088e-06
rs72863882	G	A	0.08353	-0.2569	0.0475	6.45654e-08
rs150370599	C	T	0.08341	0.2183	0.0457	1.77828e-06
rs143557119	G	A	0.02199	0.4327	0.0946	4.7863e-06
rs117345475	A	G	0.02062	-0.4332	0.0933	3.46737e-06
rs117486267	T	C	0.02486	-0.4003	0.0834	1.58489e-06
rs9905973	G	A	0.271	-0.1405	0.0276	3.54813e-07
rs147881440	G	A	0.06428	-0.2331	0.051	4.7863e-06
rs200652433	C	T	0.04112	0.3389	0.0684	7.24436e-07
rs7249773	G	A	0.15121	0.1749	0.0351	6.0256e-07
rs1065853	G	T	0.07778	0.2266	0.0463	1e-06

## Sheet: Supplementary Table S3
Supplementary Table S3: Instrumental variables used in MR analysis in Parkinson's disease. (P<5e-5)
rsid	effect_allele	other_allele	effect_allele_frequency	beta	standard_error	p_value
rs74773666	C	G	0.0034598	-1.04352	0.252421	3.56443e-05
rs1240761	C	T	0.0760394	0.161949	0.0386184	2.74581e-05
rs61814205	C	A	0.140401	0.122312	0.0295632	3.51382e-05
rs35603727	A	G	0.0386546	0.348407	0.04946	1.86509e-12
rs12747451	G	A	0.520511	0.0897194	0.0210666	2.05485e-05
rs57848722	T	C	0.10533	0.137146	0.0331545	3.52509e-05
rs78479546	A	C	0.0264238	0.259618	0.0610276	2.09889e-05
rs12759573	G	A	0.641805	-0.091384	0.0217785	2.71588e-05
rs150333605	C	T	0.0274425	-0.296685	0.0712317	3.11258e-05
rs2502428	G	A	0.195247	0.105553	0.0259661	4.80297e-05
rs75218231	G	A	0.00752749	-0.729551	0.154951	2.49822e-06
rs72776604	A	G	0.0506846	-0.212711	0.0507761	2.79943e-05
rs1401852	C	T	0.522344	-0.0922878	0.0210275	1.1392e-05
rs116661870	T	C	0.0411356	0.238125	0.0494888	1.49655e-06
rs142753050	C	A	0.00819503	0.439632	0.101823	1.5771e-05
rs62150277	T	C	0.002717	0.666684	0.163483	4.54266e-05
rs10928512	T	G	0.594669	0.0896635	0.0215606	3.20111e-05
rs7606168	C	T	0.749906	0.105177	0.024735	2.11743e-05
rs72484023	A	G	0.0547655	-0.2104	0.0501415	2.71531e-05
rs71323011	C	T	0.210536	-0.108362	0.0262248	3.59517e-05
rs146070700	A	G	0.0103197	-0.51309	0.124833	3.95312e-05
rs75942641	A	G	0.036236	-0.262278	0.0605805	1.4951e-05
rs16854140	T	C	0.152682	-0.141094	0.0302354	3.06344e-06
rs80117947	T	C	0.00324474	0.646924	0.153796	2.59496e-05
rs7650456	G	C	0.115844	0.144633	0.0316248	4.79844e-06
rs9841498	T	C	0.25504	-0.108801	0.0245256	9.15567e-06
rs34311866	C	T	0.20661	0.124605	0.0254489	9.76675e-07
rs13105679	C	G	0.411543	-0.0913453	0.0215494	2.24636e-05
rs4373196	A	C	0.409323	0.0866057	0.0212821	4.71314e-05
rs36067287	C	T	0.0320198	0.247747	0.0558004	9.0014e-06
rs145343218	T	C	0.012652	-0.493951	0.110986	8.56426e-06
rs72881504	C	G	0.00477897	0.592907	0.133925	9.54817e-06
rs2583990	G	A	0.81471	0.152702	0.0278325	4.10034e-08
rs17046072	T	C	0.159205	0.122251	0.0282578	1.51656e-05
rs12331618	G	A	0.57496	-0.0915818	0.0211226	1.45288e-05
rs67569121	C	A	0.153567	0.116068	0.0283214	4.16303e-05
rs115620277	G	A	0.0291172	0.248096	0.0591468	2.73376e-05
rs66465003	G	A	0.120502	-0.140076	0.0333308	2.63888e-05
rs74558405	A	G	0.04914	-0.218672	0.0517619	2.39398e-05
rs3934591	G	A	0.509405	0.105944	0.0211321	5.34737e-07
rs845890	C	A	0.184991	0.108612	0.0266526	4.59971e-05
rs142919280	A	T	0.00911089	0.428854	0.0975597	1.1036e-05
rs114335056	G	A	0.150681	-0.147532	0.0305384	1.35819e-06
rs12662228	A	G	0.0636247	0.17366	0.0419772	3.51844e-05
rs118136794	G	A	0.038998	0.219181	0.0519891	2.48788e-05
rs151305702	A	C	0.185275	-0.14004	0.027792	4.6836e-07
rs45480197	A	G	0.0131117	0.356799	0.0832717	1.82941e-05
rs61756902	C	G	0.00514274	0.537627	0.127361	2.42924e-05
rs151246279	G	A	0.0410984	-0.243772	0.0567611	1.74928e-05
rs141184703	T	A	0.00151531	0.860713	0.210941	4.49687e-05
rs10271158	G	A	0.294422	0.106862	0.0229364	3.17687e-06
rs71260019	T	C	0.0431741	-0.240999	0.055638	1.48061e-05
rs145166201	C	T	0.00127806	-3.10791	0.736202	2.42627e-05
rs147219362	T	C	0.00165504	0.86528	0.21164	4.3427e-05
rs374417259	C	T	0.0986284	0.145472	0.0343604	2.29863e-05
rs1346278	C	T	0.0180643	0.29676	0.0719241	3.69105e-05
rs62498020	C	G	0.0514784	0.198528	0.0458971	1.52191e-05
rs55667647	GTA	G	0.492704	0.104796	0.0210085	6.09144e-07
rs148452891	G	C	0.00922487	0.42398	0.0979871	1.51224e-05
rs2509770	A	T	0.058013	-0.226462	0.0485433	3.08397e-06
rs6470633	C	T	0.148835	-0.127813	0.0304714	2.73464e-05
rs72728578	C	T	0.0779998	-0.190293	0.0421796	6.43695e-06
rs71370984	ATT	A	0.00159932	0.940715	0.213597	1.06189e-05
rs10981484	T	C	0.0446679	0.200138	0.0475258	2.54091e-05
rs78246462	C	T	0.011861	0.362125	0.0877278	3.66218e-05
rs61845846	T	C	0.21201	0.112444	0.0252426	8.40679e-06
rs118049046	T	C	0.0202519	-0.344399	0.0845094	4.596e-05
rs6585335	T	C	0.620742	0.0957628	0.0218132	1.13279e-05
rs66915007	G	C	0.258093	-0.108579	0.0245521	9.76113e-06
rs7116239	T	C	0.735723	-0.104407	0.0234966	8.85197e-06
rs117893454	A	G	0.00673063	-0.709548	0.163788	1.47679e-05
rs11226928	T	C	0.776248	-0.112692	0.0247269	5.17762e-06
rs4285931	C	T	0.259673	-0.109932	0.0245419	7.48635e-06
rs3847922	T	G	0.286511	-0.0994387	0.0237296	2.78356e-05
rs75665194	G	C	0.0315553	-0.293255	0.0659309	8.67062e-06
rs79024095	G	T	0.0396198	-0.233719	0.0575765	4.92232e-05
rs74415029	G	A	0.0178965	0.300358	0.071454	2.62797e-05
rs4489814	G	A	0.852775	-0.119684	0.0287606	3.1633e-05
rs11612666	G	T	0.175033	-0.121894	0.0285344	1.93888e-05
rs3748268	G	A	0.132035	-0.136786	0.0320812	2.01025e-05
rs1956626	A	G	0.428892	0.0943141	0.0211541	8.2562e-06
rs186771067	T	A	0.0328775	0.252483	0.055025	4.46406e-06
rs78746245	A	C	0.0331748	0.229383	0.0552035	3.24983e-05
rs72708683	G	C	0.0204217	-0.339156	0.0823143	3.78451e-05
rs36185677	T	A	0.0893425	0.145411	0.0355017	4.20572e-05
rs11072689	A	G	0.0353247	0.224725	0.0543924	3.60313e-05
rs141243902	A	T	0.039736	-0.246037	0.0577721	2.05565e-05
rs117503845	A	G	0.00465426	-1.34756	0.239795	1.91337e-08
rs11646097	C	T	0.557584	-0.0952021	0.0210736	6.25446e-06
rs75280493	C	T	0.00581592	-0.711756	0.169219	2.59783e-05
rs4284662	T	G	0.0213048	0.298699	0.0729674	4.24737e-05
rs11075309	C	T	0.131926	-0.137136	0.0320654	1.89636e-05
rs371828274	A	G	0.087205	0.1669	0.0365971	5.10376e-06
rs8051415	G	T	0.0187061	-0.352173	0.0857786	4.03274e-05
rs117310434	A	G	0.0127	-0.452607	0.110721	4.35472e-05
rs77704942	C	T	0.0743885	0.161436	0.0387674	3.12406e-05
rs190268994	T	G	0.00305021	-1.15656	0.265966	1.37053e-05
rs76670471	G	A	0.0791543	0.156324	0.0373648	2.86761e-05
rs2532362	T	G	0.0819032	-0.249454	0.0413989	1.68461e-09
rs2696499	G	C	0.0805071	-0.271011	0.041817	9.12011e-11
rs73323419	C	T	0.0328526	0.229013	0.0553539	3.51496e-05
rs874132	T	G	0.517788	-0.0898094	0.0210197	1.93179e-05
rs140855659	A	G	0.0168035	-0.401332	0.0923838	1.39794e-05
rs12611282	A	G	0.358665	0.0963849	0.021854	1.03174e-05
rs73536723	A	G	0.0158783	-0.459924	0.0975357	2.4119e-06
rs1039106	G	A	0.562169	-0.089083	0.0211776	2.59394e-05
rs74963755	C	A	0.0669112	0.185594	0.0404379	4.44079e-06
rs17804573	C	A	0.237113	0.101225	0.0242922	3.08674e-05
rs148983668	A	G	0.00479218	-0.783892	0.190622	3.9176e-05
rs140529886	C	G	0.0236596	0.267826	0.0630925	2.1862e-05
rs73210245	A	T	0.134193	-0.14559	0.0320987	5.74143e-06
rs144174710	G	A	0.00646941	-0.769466	0.160545	1.64426e-06
rs77628790	G	T	0.0545419	0.231167	0.0437378	1.25505e-07
rs45529631	C	T	0.0147045	0.335199	0.0800429	2.81754e-05

## Sheet: Supplementary Table S4
Supplementary Table S4: Instrumental variables used in MR analysis in N-acetylaspartate (naa) levels. (P<5e-5)
rsid	effect_allele	other_allele	effect_allele_frequency	beta	standard_error	p_value
rs12039358	G	T	0.227402	-0.0910294	0.0184878	8.49033e-07
rs35308250	C	A	0.292432	0.0764696	0.0169105	6.12521e-06
rs139706814	G	A	0.0328242	-0.196608	0.0437219	6.89914e-06
rs62127223	A	G	0.0820923	-0.136176	0.0283979	1.62445e-06
rs9869057	C	T	0.998185	-0.811824	0.183334	9.50571e-06
rs150965318	C	T	0.0276535	-0.209464	0.0468532	7.79847e-06
rs544693361	T	C	0.0104899	-0.347238	0.0754801	4.217e-06
rs79315153	G	A	0.116476	-0.10644	0.0237273	7.25895e-06
rs2248456	A	G	0.494379	0.0745846	0.0154974	1.48899e-06
rs35911794	C	T	0.0338346	0.192938	0.042974	7.13446e-06
rs10845794	T	G	0.536408	-0.0705395	0.0158112	8.1442e-06
rs74895134	A	G	0.0166503	0.266447	0.0599771	8.89292e-06
rs117572246	A	G	0.0128793	-0.335037	0.0692125	1.29385e-06
rs2025408	A	C	0.0106869	-0.336702	0.0757383	8.76491e-06
rs150753233	G	A	0.00908417	0.388784	0.0814519	1.81348e-06
rs11073480	G	A	0.157032	0.0960883	0.021254	6.1561e-06
rs113199593	G	A	0.0116265	-0.318765	0.0717581	8.90352e-06
rs74509445	T	C	0.0667167	-0.139499	0.0313242	8.4528e-06
rs11868853	G	A	0.260506	0.0822351	0.0175866	2.92522e-06
rs80135198	T	C	0.0169512	0.27184	0.0603487	6.65316e-06
rs409751	T	C	0.558491	0.0743278	0.0161645	4.26133e-06

## Sheet: Supplementary Table S5
Supplementary Table S5: Effect estimates of the associations of Cathepsin B,N-acetylaspartate (naa) levels and Parkinson Disease after excluding outliers SNPs.
exposure to outcome	method	nsnp	b	se	pval	or	or_lci95	or_uci95
Cathepsin B to Parkinson Disease	MR Egger	20	-0.0656723	0.0826281	0.437088	0.936438	0.796424	1.10107
	Weighted median	20	-0.0723168	0.0542629	0.182626	0.930236	0.83638	1.03462
	Inverse variance weighted	20	-0.0865715	0.0349549	0.0132617	0.91707	0.856344	0.982102
	Simple mode	20	-0.126988	0.0939814	0.192501	0.880744	0.732573	1.05888
	Weighted mode	20	-0.0786198	0.0570227	0.183991	0.924391	0.826641	1.0337
Parkinson Disease to Cathepsin B	MR Egger	104	0.00539603	0.0268435	0.841085	1.00541	0.95388	1.05972
	Weighted median	104	0.00383112	0.0360237	0.915305	1.00384	0.935405	1.07728
	Inverse variance weighted	104	0.00345111	0.0191093	0.856683	1.00346	0.966568	1.04175
	Simple mode	104	-0.128585	0.067995	0.0614216	0.879339	0.769622	1.0047
	Weighted mode	104	-0.000706004	0.0295246	0.980969	0.999294	0.943108	1.05883
Cathepsin B to N-acetylaspartate	MR Egger	17	-0.106681	0.0617175	0.104414	0.898812	0.796405	1.01439
	Weighted median	17	-0.102169	0.0366614	0.00532261	0.902877	0.840275	0.970142
	Inverse variance weighted	17	-0.0672552	0.0262909	0.010524	0.934957	0.887998	0.984398
	Simple mode	17	-0.0898474	0.0616146	0.164131	0.914071	0.810088	1.0314
	Weighted mode	17	-0.101346	0.039072	0.0195844	0.90362	0.837003	0.975539
N-acetylaspartate to Parkinson Disease	MR Egger	20	0.114074	0.0700558	0.120831	1.12084	0.977033	1.2858
	Weighted median	20	0.141713	0.0678232	0.0366672	1.15225	1.00882	1.31607
	Inverse variance weighted	20	0.0968128	0.0475901	0.0419208	1.10165	1.00354	1.20936
	Simple mode	20	0.10984	0.122308	0.380395	1.1161	0.878197	1.41845
	Weighted mode	20	0.142347	0.0645641	0.0399963	1.15298	1.01593	1.30852

## Sheet: Supplementary Table S6
Supplementary Table S6: Evaluation of heterogeneity and horizontal pleiotropy using different method
Exposure	Outcome	Horizontal pleiotropy test				Heterogeneity test
		MR-Egger regression		MR-PRESSO		IVW		MR-Egger
		Egger intercept	P value	Global Test RSSobs	Global test p value	Q value	P value	Q value	P value
Cathepsin B	Parkinson Disease	-0.0062	0.7833	18.8603	0.585	17.455	0.5591	17.3771	0.4973
Parkinson Disease	Cathepsin B	-0.0006	0.918	96.0917	0.713	94.8062	0.7054	94.7956	0.6808
Cathepsin B	N-acetylaspartate	0.0111	0.491	12.8916	0.802	10.8513	0.8186	10.3528	0.797
N-acetylaspartate	Parkinson Disease	-0.0041	0.7356	25.0351	0.314	22.3916	0.2652	22.2462	0.2212

## Sheet: Supplementary Table S7
Supplementary Table S7: Characteristic of the Cathepsin B-related genetic variants and their effects on Parkinson Disease (20 SNPs)
exposure	outcome	SNP	b	se	p	or	or_lci95	or_uci95
Cathepsin B	Parkinson Disease	rs1065853	0.228918	0.206222	0.266973	1.25724	0.839225	1.88346
Cathepsin B	Parkinson Disease	rs113646963	0.309887	0.212682	0.145105	1.36327	0.898552	2.06834
Cathepsin B	Parkinson Disease	rs11563944	-0.224222	0.218967	0.305838	0.799138	0.520275	1.22747
Cathepsin B	Parkinson Disease	rs117345475	-0.213357	0.31376	0.496505	0.807868	0.436779	1.49423
Cathepsin B	Parkinson Disease	rs117486267	0.166735	0.171274	0.330306	1.18144	0.844541	1.65274
Cathepsin B	Parkinson Disease	rs13152767	-0.278629	0.144934	0.0545483	0.756821	0.569669	1.00546
Cathepsin B	Parkinson Disease	rs143557119	-0.0424479	0.167744	0.800229	0.95844	0.689887	1.33153
Cathepsin B	Parkinson Disease	rs147881440	-0.116527	0.166533	0.484099	0.890006	0.642151	1.23353
Cathepsin B	Parkinson Disease	rs148930853	-0.107805	0.159952	0.500322	0.897803	0.656187	1.22839
Cathepsin B	Parkinson Disease	rs150370599	-0.24685	0.186345	0.185274	0.781258	0.542218	1.12568
Cathepsin B	Parkinson Disease	rs150811995	0.0661777	0.164192	0.686911	1.06842	0.774421	1.47402
Cathepsin B	Parkinson Disease	rs1692819	-0.0688368	0.0632108	0.276152	0.933479	0.824705	1.0566
Cathepsin B	Parkinson Disease	rs200518932	-0.512808	0.336909	0.127985	0.598812	0.309391	1.15897
Cathepsin B	Parkinson Disease	rs200652433	-0.262909	0.276278	0.341294	0.768812	0.44735	1.32127
Cathepsin B	Parkinson Disease	rs36021960	-0.0626617	0.191969	0.74411	0.939261	0.644732	1.36834
Cathepsin B	Parkinson Disease	rs7249773	-0.317341	0.15664	0.0427727	0.728082	0.535606	0.989727
Cathepsin B	Parkinson Disease	rs72863882	-0.234929	0.163784	0.151462	0.790627	0.57353	1.0899
Cathepsin B	Parkinson Disease	rs75773690	-0.0683067	0.143072	0.633056	0.933974	0.705586	1.23629
Cathepsin B	Parkinson Disease	rs76089522	-0.10101	0.203232	0.619177	0.903924	0.606929	1.34625
Cathepsin B	Parkinson Disease	rs9905973	0.00846463	0.173795	0.961155	1.0085	0.717363	1.4178

## Sheet: Supplementary Table S8
Supplementary Table S8: Characteristic of the Cathepsin B-related genetic variants and their effects on N-acetylaspartate (17 SNPs)
exposure	outcome	SNP	b	se	p	or	or_lci95	or_uci95
Cathepsin B	N-acetylaspartate	rs1065853	-0.115004	0.123519	0.351819	0.891362	0.699701	1.13552
Cathepsin B	N-acetylaspartate	rs113646963	-0.115215	0.136717	0.39938	0.891174	0.68169	1.16503
Cathepsin B	N-acetylaspartate	rs11563944	0.0906204	0.136603	0.507083	1.09485	0.837679	1.43098
Cathepsin B	N-acetylaspartate	rs117345475	0.270478	0.15532	0.0816098	1.31059	0.96662	1.77696
Cathepsin B	N-acetylaspartate	rs117486267	0.0770322	0.143764	0.592079	1.08008	0.814855	1.43162
Cathepsin B	N-acetylaspartate	rs143557119	-0.191014	0.157572	0.225424	0.826121	0.606618	1.12505
Cathepsin B	N-acetylaspartate	rs147881440	-0.0177028	0.141318	0.90031	0.982453	0.744765	1.296
Cathepsin B	N-acetylaspartate	rs148930853	-0.0553216	0.137045	0.686453	0.946181	0.723301	1.23774
Cathepsin B	N-acetylaspartate	rs150370599	-0.0111686	0.131719	0.932427	0.988894	0.763886	1.28018
Cathepsin B	N-acetylaspartate	rs1692819	-0.103669	0.041654	0.012817	0.901524	0.830846	0.978214
Cathepsin B	N-acetylaspartate	rs200518932	-0.0141797	0.150647	0.92501	0.98592	0.733852	1.32457
Cathepsin B	N-acetylaspartate	rs36021960	0.00667195	0.132739	0.959912	1.00669	0.776082	1.30583
Cathepsin B	N-acetylaspartate	rs7249773	-0.088327	0.129358	0.494726	0.915461	0.710442	1.17965
Cathepsin B	N-acetylaspartate	rs72863882	-0.128653	0.117228	0.272442	0.879279	0.69878	1.1064
Cathepsin B	N-acetylaspartate	rs75773690	-0.192885	0.140986	0.171276	0.824577	0.625492	1.08703
Cathepsin B	N-acetylaspartate	rs76089522	-0.00687154	0.13061	0.958042	0.993152	0.768844	1.2829
Cathepsin B	N-acetylaspartate	rs9905973	-0.100639	0.124599	0.419262	0.904259	0.708324	1.15439

## Sheet: Supplementary Table S9
Supplementary Table S9: Characteristic of the N-acetylaspartate-related genetic variants and their effects on Parkinson Disease (20 SNPs)
exposure	outcome	SNP	b	se	p	or	or_lci95	or_uci95
N-acetylaspartate	Parkinson Disease	rs10845794	0.503324	0.299302	0.0926349	1.65421	0.920068	2.97414
N-acetylaspartate	Parkinson Disease	rs11073480	0.0768261	0.393683	0.845278	1.07985	0.499178	2.33601
N-acetylaspartate	Parkinson Disease	rs113199593	0.407874	0.239916	0.0891175	1.50362	0.939544	2.40635
N-acetylaspartate	Parkinson Disease	rs117572246	0.205654	0.14607	0.159156	1.22833	0.922523	1.6355
N-acetylaspartate	Parkinson Disease	rs11868853	0.551498	0.302539	0.0683184	1.73585	0.959371	3.14079
N-acetylaspartate	Parkinson Disease	rs12039358	0.173217	0.248682	0.486092	1.18912	0.730372	1.93602
N-acetylaspartate	Parkinson Disease	rs139706814	-0.205094	0.252706	0.417026	0.81457	0.496387	1.33671
N-acetylaspartate	Parkinson Disease	rs150753233	0.0989076	0.200605	0.62198	1.10396	0.745069	1.63574
N-acetylaspartate	Parkinson Disease	rs150965318	-0.381928	0.288897	0.186161	0.682544	0.387451	1.20239
N-acetylaspartate	Parkinson Disease	rs2025408	-0.304569	0.271372	0.261722	0.737441	0.433242	1.25523
N-acetylaspartate	Parkinson Disease	rs2248456	-0.552149	0.284293	0.0521153	0.575711	0.329769	1.00508
N-acetylaspartate	Parkinson Disease	rs35308250	0.125728	0.301231	0.676399	1.13397	0.628333	2.04652
N-acetylaspartate	Parkinson Disease	rs35911794	-0.0248709	0.266187	0.925559	0.975436	0.578916	1.64355
N-acetylaspartate	Parkinson Disease	rs409751	0.30713	0.283898	0.279327	1.35952	0.779339	2.37161
N-acetylaspartate	Parkinson Disease	rs62127223	0.0560137	0.261294	0.830258	1.05761	0.633736	1.765
N-acetylaspartate	Parkinson Disease	rs74509445	-0.0990595	0.28348	0.726759	0.905689	0.519608	1.57864
N-acetylaspartate	Parkinson Disease	rs74895134	0.158079	0.657722	0.810064	1.17126	0.322693	4.25125
N-acetylaspartate	Parkinson Disease	rs79315153	-0.352397	0.318296	0.268235	0.703001	0.376719	1.31188
N-acetylaspartate	Parkinson Disease	rs80135198	-0.0626983	0.225284	0.780776	0.939227	0.603955	1.46062
N-acetylaspartate	Parkinson Disease	rs9869057	0.147707	0.0650336	0.0231324	1.15917	1.02045	1.31676
